# Supplementary material for: Growth-rate dependency of de novo resveratrol production in chemostat cultures of an engineered Saccharomyces cerevisiae strain
Source: PubMed Central journal article supplement (PMC4570684; doi:10.1186/s12934-015-0321-6), 2015-09-14

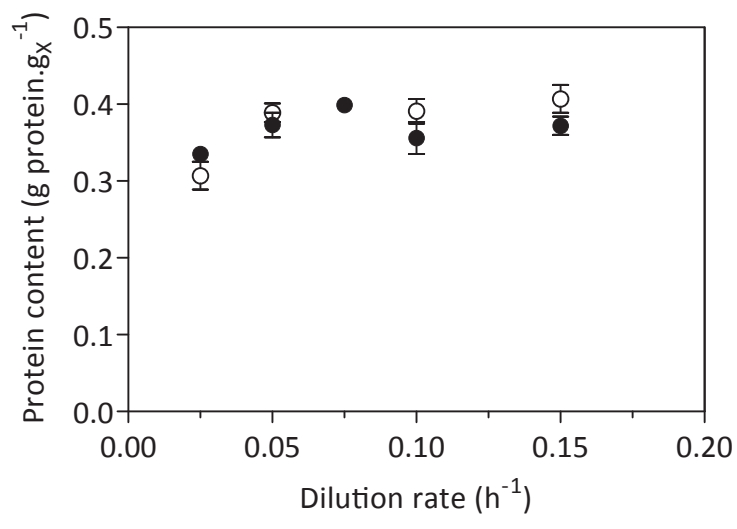

Supplement: 12934_2015_321_MOESM2_ESM.pdf [file 12934_2015_321_MOESM2_ESM.pdf]
